# Supplementary material for: Maternal HIV-1 Env Vaccination for Systemic and Breast Milk Immunity To Prevent Oral SHIV Acquisition in Infant Macaques
Source: PubMed Central journal article supplement (PMC5760748; doi:10.1128/msphere.00505-17), 2018-01-10
Supplement: sph001182446st1.pdf [file sph001182446st1.pdf]

**Supplemental Table 1. Amino acid sequences for antigens used in ELISA and BAMA assays.**

| Assay | Protein                    | Peptide                                    | Sequence                                                                                                                                                                                                                                                                                                                                                                                                                                                                                                                |
|-------|----------------------------|--------------------------------------------|-------------------------------------------------------------------------------------------------------------------------------------------------------------------------------------------------------------------------------------------------------------------------------------------------------------------------------------------------------------------------------------------------------------------------------------------------------------------------------------------------------------------------|
| ELISA | 1086D7 gp120K160N/293F     |                                            | SVPVWKEAKTTLFCASDAKAYEKEVHNWVATHACVPTDPNPQEMVLANVTENFNMMWKNMVDQMHEDIISLWDESLKPCVKLTPLCVTLNCTNVKGNESD<br>TSEVMKNCFSNATTELKDKKHKVHALFYKLDVVPVPLNGNSSSSSSEYRLINCNNTSAITQACPKVSPDPIPLHYCAPAGFAILKCNKTFNGTGPCRNVSTVQ<br>CTHGIRPVVSTQQLLNGSLAEEIIIRSENLTNNAKTIIVHLNESVNIIVCTRPNNNTRKSIIRIGPGQTFYATGDIIGNIRQAHCNINESKWNNTLQKVG<br>ELAKHFPKTIKFEPSGGDLEITTHSFNCRGEFFYCNTSDLFNGTYRNGTYNHTGRSSNGITLQCKIKQIINMWQEVGRAIYAPPIEGEITCNSNITG<br>LLLLRDGGQSNETNDTETFRPGGGMDRDNWRSELYKYKVVEIKPLGVAPTEAKRRVVEREKR                          |
|       | SHIV1157ipd3N4 D11 gp120   |                                            | VPVWKEAKTTLFCASNAKAYEKEVHNWVATHACVPTDPNPQEVIVLGNVTENFNMMWKNMVDQMHEDIISLWDQSLKPCVKLTSLCVTLKCSNFTGKSNVT<br>YKGDMEVKNCFSNVVTEIRDKKQKVYALFYRLDITPLDDNSSEYILINCNSTITQACPKVNFDPPIIHYCAPAGYAILKCNKTFNGTGPCRNVSTVQC<br>THGIRKPVVSTQQLLNGSLAEEIIIRSENLTNDNVKTIIVHFNESVEITCTRPNNNTRKSIIRIGPGQAIYATGDIIGDIRQAHCNISKENWNNTLQWVRGK<br>LKEHFPNKTIIVFKPSSGGDLEITTHSFNCRGEFFYCNTSKLFNSTDNSTHMGTENNTIITIPCRIKQIINMWQEVGRAMYAPPIEGNITCKSNITGLLLV<br>RDGGWDNSTNDTETFRPGGGMDRDNWRSELYKYKVVEKPLGIAPTAKAKRRVVEREKE                            |
|       |                            | (Linear) Bio-V3. C                         | KKKNNTRKSIIRIGPGQTFYATGDIIGDIRQAHC                                                                                                                                                                                                                                                                                                                                                                                                                                                                                      |
|       |                            | (linear) Bio-V2 1086.C<br>gp70 V1V2 1086.C | KKKTELKDKKHKVHALFYKLDVVP<br>CTNVKGNESDTESEVMKNCFSKATTELKDKKHKVHALFYKLDVVPVPLNGNSSSSSSEYRLINCN                                                                                                                                                                                                                                                                                                                                                                                                                           |
| BAMA  | Con 6 gp120                |                                            | AENLWVTVYYGVPVWKEANTTLFCASDAKAYDTEVHNWVATHACVPTDPNPQEVIVLENVTENFNMMWKNMVEQMHEDIISLWDQSLKPCVKLTPLCVTLN<br>CTNVRNVSSNGTETDNEEIKNCSFNITTELDRDKKQKVYALFYRLDVPIDDKNSSEYIISGKNSSEYRLINCNNTSAITQACPKVSPDPIIHYCAPAGFAI<br>LKCNDKFPNGTGPCRNVSTVQCTHGIRPVVSTQQLLNGSLAEEIIIRSENLTNNAKTIIVQLNESVEINCTRPNNNTRKSIIRIGPGQAFYATGDIIGDI<br>RQAHCNISRKWNNTLQVAKKLEHFNNKTIIVFKPSSGGDLEITTHSFNCRGEFFYCNTSGLFNSTWFMNGTYMFMNGTKDNSETITLPCRICKQIINMWQ<br>GVGQAMYAPPIEGKITCKSNITGLLLTRDGGNNSKKNKTETFRPGGGMDRDNWRSELYKYKVVKIEPLGVAPTAKARRVVEREKR |
|       | MN gp120 gD neg/293F/mon   |                                            | TEKLWVTVYYGVPVWKEANTTLFCASDAKAYDTEAHNVWVATHACVPTDPNPQEVIVLENVTENFNMMWKNMVEQMHEDIISLWDQSLKPCVKLTPLCVTLN<br>CTDLRNTTNTNNDNNNSKSEGTIKGEMKNCFSNITTSIGDKMKEKALYKLDIEPIDNDSTSYRLISCNSTSVITQACPKISFEPPIIHYCAPAGFA<br>ILKCNKDKFSGKSCKNVSTVQCTHGIRPVVSTQQLLNGSLAEEVIRSEDFDNTAKTIIVHLKESVQINCTRPNNYKRRKRIHIGPGRAFYTTKNIKGT<br>IRQAHCIIISRAKWNNTLRQIVSKLKEQFKNKTIIVFNPSGGDPEIVMHSFNCGGEFFYCNTSPLFNSIWNNGNNTWNNTTGSNNNTLQCKIKQIINMWQK<br>VGKAMYAPPIEQIRCSNITGLLLTRDGGEDTDNDTEIFRPGGGMDRDNWRSELYKYKVVTIEPLGVAPTAKARRVVEREKR          |
|       | ConC gp120 WT              |                                            | NLWVTVYYGVPVWKEAKTTLFCASDAKAYEKEVHNWVATHACVPTDPNPQEMVLENVTENFNMMWKNMVDQMHEDIISLWDQSLKPCVKLTPLCVTLNCR<br>NVTNATNNTYNEEIKNCSFNITTELDRDKKQKVYALFYRLDIVPLNNSSEYRLINCNNTSAITQACPKVSPDPIIHYCAPAGYAILKCNKTFNGTGPCN<br>NVSTVQCTHGIRPVVSTQQLLNGSLAEEIIIRSENLTNNAKTIIVHLNESVEIVCTRPNNNTRKSIIRIGPGQTFYATGDIIGDIRQAHCNISEDKWNNT<br>LQRVSKLKEHFPNKTIKFEPSGGDLEITTHSFNCRGEFFYCNTSKLFNSTYNNNTNSNSTITLPCRICKQIINMWQEVGRAMYAPPIAGNITCKSNITG<br>LLLLTRDGGKKNTEIFRPGGGMDRDNWRSELYKYKVVEIKPLGVAPTAKARRVVEREKR                               |
|       | A244 gp120 gDneg/293T      |                                            | SDNLWVTVYYGVPVWKEADTTLFCASDAKAHETEVEVHNWVATHACVPTDPNPQEVIVLENVTENFNMMWKNMVEQMHEDIISLWDQSLKPCVKLTPLCVTLH<br>CTNANLTKANLTVNNRTNVSNIIGNITDEVNCSFNMTTELDRDKKQKVYALFYKLDIVP IEDNNSSEYRLINCNNTSVIKQPCPKISFDPPIIHYCTPA<br>GYAILKCNKDFNFTGPCRNVSTVQCTHGIRPVVSTQQLLNGSLAEEIIIRSENLTNNAKTIIVHLNKSVINCTRPNSNTRTSITIGPGQVYRTGDI<br>IGDIRKAYCEINGTEWNAKQVTEKLEHFNKPIIFQPPSSGGDLEITMHHFNCRGEFFYCNTTRLFNNTCIANGTIEGCNGNITLPCRICKQIINMWQ<br>AGQAMYAPPISGTINCVSNTIGILLTRDGGATNNTNNTFRPGGGNIDNWRNELYKYKVQIEPLGVAPTRAKARRVVEREKR           |
|       |                            | (linear) Bio-V2 1086.C                     | KKKTELKDKKHKVHALFYKLDVVP                                                                                                                                                                                                                                                                                                                                                                                                                                                                                                |
|       |                            | gp70 V1V2 1086.C                           | CTNVKGNESDTESEVMKNCFSKATTELKDKKHKVHALFYKLDVVPVPLNGNSSSSSSEYRLINCN                                                                                                                                                                                                                                                                                                                                                                                                                                                       |
|       |                            | (Linear) Bio-V3. C                         | KKKNNTRKSIIRIGPGQTFYATGDIIGDIRQAHC                                                                                                                                                                                                                                                                                                                                                                                                                                                                                      |
|       |                            | gp70 ConC V3 tags                          | CTRPNNNTRKSIIRIGPGQTFYATGDIIGDIRQAHC                                                                                                                                                                                                                                                                                                                                                                                                                                                                                    |
|       | (Linear) C1 Biotin         | KKKMQEDVISLWDQSLKPCVKLTPLCV                |                                                                                                                                                                                                                                                                                                                                                                                                                                                                                                                         |
|       | (linear C5) Bio_RV144_C5.2 | KKKSELYKYKVVEIKPLGIAPTAKARRVVEREKR         |                                                                                                                                                                                                                                                                                                                                                                                                                                                                                                                         |
