# Supplementary material for: Maternal HIV-1 Env Vaccination for Systemic and Breast Milk Immunity To Prevent Oral SHIV Acquisition in Infant Macaques
Source: PubMed Central journal article supplement (PMC5760748; doi:10.1128/msphere.00505-17), 2018-01-10
Supplement: sph001182446st2.pdf [file sph001182446st2.pdf]

**Supplemental Table 2. Abs used for flow cytometric phenotyping of CD4+ T cell populations.**

| <b>CD4+ T Cell Panel</b> |                                                   |                    |              |                |                    |
|--------------------------|---------------------------------------------------|--------------------|--------------|----------------|--------------------|
| <b>Marker</b>            | <b>Surface/Intracellular Staining<sup>a</sup></b> | <b>Fluorophore</b> | <b>Clone</b> | <b>Vendor</b>  | <b>Catalog No.</b> |
| Live/Dead                |                                                   | Yellow             | N/A          | Invitrogen     | L34959             |
| CD3                      | S/IC                                              | BV421              | SP34-2       | BD Biosciences | 562877             |
| CD4                      | S                                                 | PerCP-Cy5.5        | L200         | BD Biosciences | 552838             |
| CD8                      | S                                                 | Alexa Fluor 700    | RPA-T8       | BD Biosciences | 557945             |
| CD69                     | S                                                 | PE-Cy7             | FN50         | BD Biosciences | 557745             |
| CCR5                     | S                                                 | PE                 | 3A9          | BD Biosciences | 550632             |
| Ki-67                    | IC                                                | FITC               | B56          | BD Biosciences | 556026             |
| TNF- $\alpha$            | IC                                                | BV560              | MAB11        | BD Biosciences | 563418             |

<sup>a</sup>S indicates surface staining, IC indicates intracellular staining.
